# Supplementary material for: Imaging the effect of the circadian light–dark cycle on the glymphatic system in awake rats
Source: PubMed Central journal article supplement (PMC6955326; doi:10.1073/pnas.1914017117), 2019-12-17
Supplement: pnas.1914017117.sapp.pdf [file pnas.1914017117.sapp.pdf]

## **Supplementary Information Appendix File**

### **Imaging the effect of the circadian light-dark cycle on the glymphatic system in awake rats**

Xuezhu Cai<sup>1</sup>, Ju Qiao<sup>1</sup>, Praveen Kulkarni<sup>1</sup>, Ian C Harding<sup>2</sup>, Eno Ebong<sup>3</sup>, Craig F Ferris<sup>1,4</sup>

<sup>1</sup>Center for Translational Neuroscience, <sup>2</sup>Department of Bioengineering, <sup>3</sup>Department of Chemical Engineering <sup>4</sup>Departments of Psychology and Pharmaceutical Sciences, Northeastern University, Boston, Massachusetts

#### **Address all Correspondence to:**

Craig Ferris, PhD, Director Center for Translational NeuroImaging

360 Huntington Ave, Boston Massachusetts, 02115

Email: [c.ferris@northeastern.edu](mailto:c.ferris@northeastern.edu)

Phone:508 259 4908

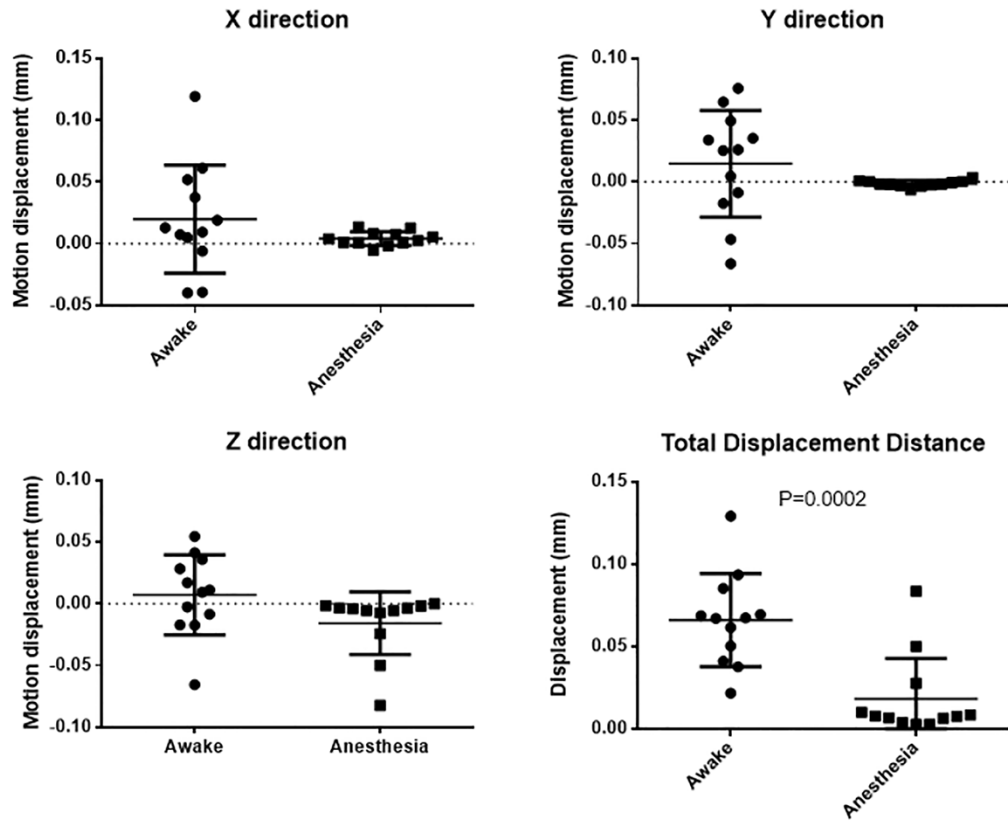

**Figure 1S.** Head motion in awake rats ( $n = 6$ ) and anesthetized rats ( $n = 6$ ) imaged during the light phase.

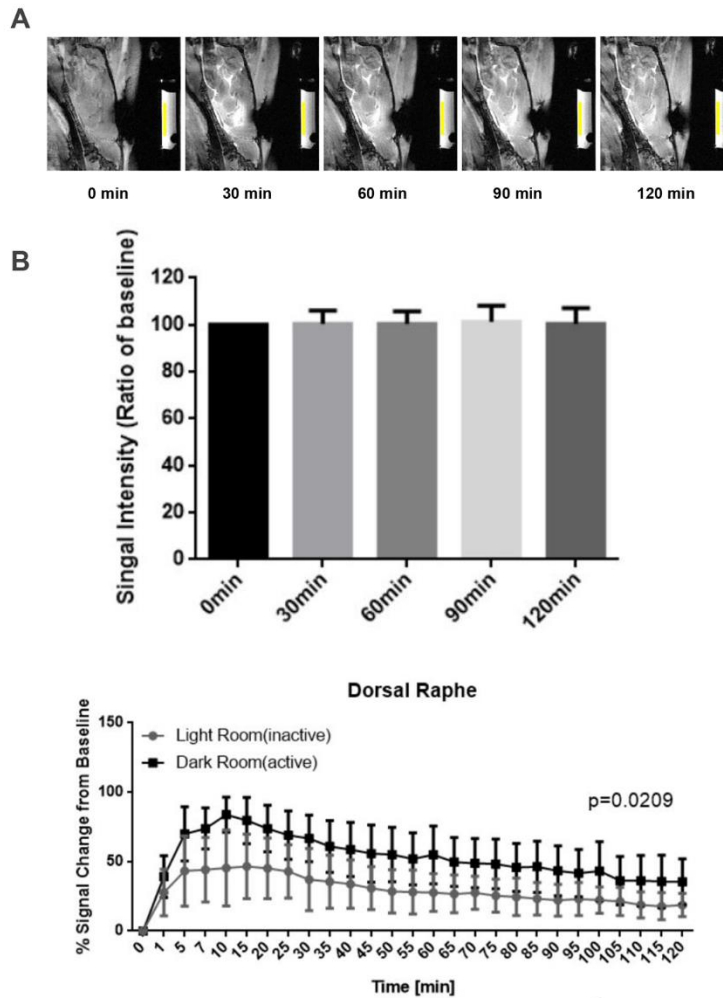

**Figure 2S.** Validation of image preprocessing with signal intensity re-scaling. (A) Representation of T1-weighted sagittal images with a colored ROI placed on the phantom adjacent to the brain at five different time points after intracerebroventricular injection of Gd-based contrast agent. (B) Quantification of re-scaled signal intensity extracted from the ROIs (n=6 per group). The bottom time-to-signal curve shows significance between the light-dark phases based on a two-way ANOVA followed by Sidak multiple correction.

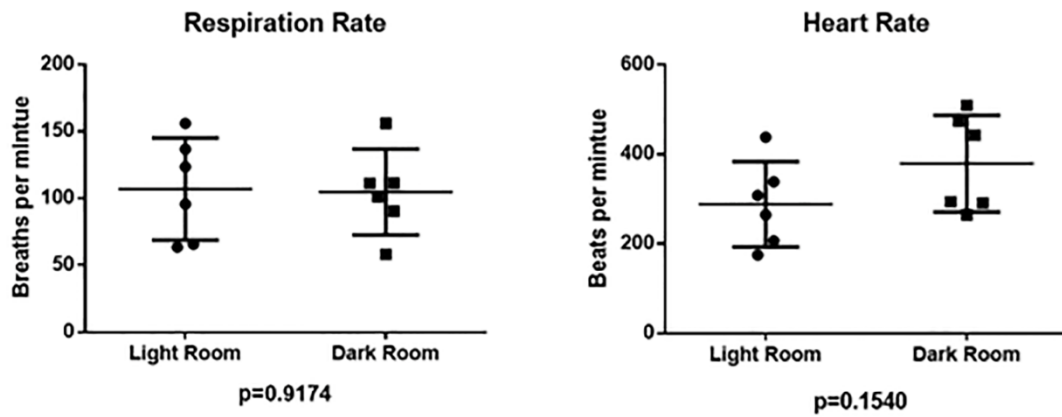

**Figure 3S.** Measures of respiration and heart rate during the scanning session in awake rats on reverse light-dark cycles.

**Table 1. Comparison of parameters derived from regional fitted time-signal curves**

| Brain Region                    | Parameters   | Light Room |       | Dark Room |       | P value |
|---------------------------------|--------------|------------|-------|-----------|-------|---------|
|                                 |              | Mean       | SD    | Mean      | SD    |         |
| Suprachiasmatic Nucleus         | AUC 0_60 *   | 2249       | 442.5 | 5077      | 2208  | 0.0117  |
|                                 | AUC 0_120 ** | 3230       | 742.6 | 8603      | 3877  | 0.0076  |
|                                 | Peak *       | 54.93      | 15.03 | 100.6     | 42.67 | 0.0329  |
|                                 | Peak Time    | 11.50      | 7.148 | 15.17     | 6.306 | 0.3683  |
| Pedunculopontine Tegmental Area | AUC 0_60 *   | 861.5      | 319.1 | 1513      | 467.3 | 0.0181  |
|                                 | AUC 0_120 ** | 1798       | 715.5 | 3357      | 960.1 | 0.0097  |
|                                 | Peak **      | 17.65      | 6.861 | 33.70     | 9.570 | 0.0075  |
|                                 | Peak Time    | 48.17      | 10.13 | 60.67     | 14.17 | 0.1092  |
| Supramammillary Nucleus         | AUC 0_60 **  | 2094       | 228.7 | 4169      | 1388  | 0.0047  |
|                                 | AUC 0_120 ** | 3501       | 623.1 | 7468      | 2247  | 0.0019  |
|                                 | Peak **      | 44.32      | 9.508 | 80.92     | 25.56 | 0.0082  |
|                                 | Peak Time    | 18.00      | 10.43 | 23.00     | 13.97 | 0.4984  |
| Sub Coeruleus Nucleus           | AUC 0_60     | 489.1      | 295.1 | 821.9     | 230.6 | 0.0545  |
|                                 | AUC 0_120 *  | 1029       | 601.1 | 1949      | 563.4 | 0.0210  |
|                                 | Peak *       | 10.78      | 5.607 | 19.53     | 5.789 | 0.0240  |
|                                 | Peak Time    | 56.67      | 40.73 | 78.67     | 17.55 | 0.2522  |
| Dorsal Raphe                    | AUC 0_60 *   | 2214       | 1111  | 3848      | 880.2 | 0.0180  |
|                                 | AUC 0_120 *  | 3548       | 1754  | 6349      | 1887  | 0.0238  |
|                                 | Peak *       | 47.28      | 21.58 | 79.34     | 13.42 | 0.0114  |
|                                 | Peak Time    | 17.50      | 21.87 | 12.17     | 8.542 | 0.5902  |
| Pontine Nuclei                  | AUC 0_60 *   | 1141       | 538.4 | 2498      | 1138  | 0.0247  |
|                                 | AUC 0_120 ** | 2287       | 1086  | 4976      | 1737  | 0.0093  |
|                                 | Peak **      | 25.09      | 9.183 | 50.72     | 17.02 | 0.0088  |
|                                 | Peak Time    | 46.17      | 37.80 | 47.33     | 38.51 | 0.9588  |
| Pontine Reticular Nucleus Oral  | AUC 0_60     | 631.3      | 254.6 | 945.9     | 267.1 | 0.0633  |
|                                 | AUC 0_120 *  | 1545       | 543.4 | 2424      | 600.5 | 0.0240  |
|                                 | Peak *       | 15.55      | 4.960 | 25.69     | 6.340 | 0.0115  |
|                                 | Peak Time    | 87.17      | 21.67 | 85.50     | 18.84 | 0.8898  |
| Entorhinal Cortex               | AUC 0_60     | 922.1      | 338.4 | 1206      | 247.7 | 0.1278  |
|                                 | AUC 0_120 *  | 2109       | 561.4 | 2942      | 461.5 | 0.0185  |
|                                 | Peak *       | 22.06      | 5.407 | 30.65     | 4.657 | 0.0145  |
|                                 | Peak Time    | 73.17      | 28.05 | 83.00     | 23.07 | 0.5222  |
| Hippocampus                     | AUC 0_60     | 1191       | 353.9 | 1646      | 414.9 | 0.0683  |
|                                 | AUC 0_120 *  | 2595       | 757.5 | 3625      | 625.7 | 0.0302  |
|                                 | Peak *       | 25.02      | 6.977 | 36.00     | 6.275 | 0.0168  |
|                                 | Peak Time    | 56.83      | 14.58 | 62.00     | 15.50 | 0.5653  |
| Midbrain                        | AUC 0_60 *   | 1127       | 418.1 | 1743      | 571.9 | 0.0590  |
|                                 | AUC 0_120 *  | 2340       | 857.1 | 3819      | 1027  | 0.0220  |
|                                 | Peak *       | 23.55      | 8.071 | 38.30     | 10.20 | 0.0195  |
|                                 | Peak Time    | 46.17      | 28.14 | 59.83     | 12.67 | 0.3035  |

|                                   |               |       |       |       |       |        |
|-----------------------------------|---------------|-------|-------|-------|-------|--------|
| Striatum                          | AUC 0_60 *    | 897.2 | 393.3 | 1439  | 381.6 | 0.0361 |
|                                   | AUC 0_120     | 2028  | 836.3 | 3094  | 835.0 | 0.0516 |
|                                   | Peak          | 19.78 | 7.706 | 29.92 | 8.461 | 0.0552 |
|                                   | Peak Time     | 70.17 | 33.09 | 70.33 | 43.65 | 0.9942 |
| Cerebellum                        | AUC 0_60      | 631.2 | 253.5 | 880.6 | 380.2 | 0.2108 |
|                                   | AUC 0_120     | 1248  | 503.1 | 1914  | 755.9 | 0.1028 |
|                                   | Peak          | 12.66 | 4.886 | 18.59 | 7.192 | 0.1260 |
|                                   | Peak Time     | 42.17 | 18.10 | 69.50 | 28.28 | 0.0741 |
| Somatosensory Cortex              | AUC 0_60      | 855.9 | 318.7 | 850.4 | 272.6 | 0.9776 |
|                                   | AUC 0_120     | 2138  | 714.3 | 2279  | 670.1 | 0.7568 |
|                                   | Peak          | 22.24 | 6.567 | 25.00 | 6.897 | 0.5348 |
|                                   | Peak Time     | 106.2 | 21.84 | 117.8 | 3.033 | 0.2734 |
| Somatosensory Cortex Barrel Field | AUC 0_60      | 717.8 | 326.6 | 877   | 259.9 | 0.3724 |
|                                   | AUC 0_120     | 1655  | 804.8 | 2060  | 646.8 | 0.3595 |
|                                   | Peak          | 16.23 | 7.779 | 21.85 | 5.539 | 0.1801 |
|                                   | Peak Time     | 87.17 | 34.08 | 100.3 | 34.93 | 0.5236 |
| Substantia Nigra                  | AUC 0_60 **   | 730.9 | 227.9 | 1667  | 498.1 | 0.0019 |
|                                   | AUC 0_120 *** | 1628  | 513.8 | 3782  | 842.8 | 0.0003 |
|                                   | Peak ***      | 16.88 | 4.957 | 38.29 | 7.117 | 0.0001 |
|                                   | Peak Time     | 60.00 | 25.31 | 80.33 | 30.65 | 0.2387 |
| Cerebellar Lobule                 | AUC 0_60      | 644.7 | 302.6 | 878.6 | 475.6 | 0.3334 |
|                                   | AUC 0_120     | 1289  | 633.2 | 1881  | 929.7 | 0.2268 |
|                                   | Peak          | 12.87 | 5.899 | 18.32 | 9.381 | 0.2556 |
|                                   | Peak Time     | 49.50 | 37.18 | 75.67 | 35.51 | 0.2409 |
| Reticular Nucleus Midbrain        | AUC 0_60 **   | 801.2 | 264.6 | 1401  | 254.5 | 0.0025 |
|                                   | AUC 0_120 **  | 1828  | 630.9 | 3228  | 462.7 | 0.0014 |
|                                   | Peak **       | 17.57 | 6.437 | 32.06 | 4.742 | 0.0013 |
|                                   | Peak Time     | 70.17 | 30.75 | 77.50 | 23.86 | 0.6543 |
| Olfactory Bulb                    | AUC 0_60      | 880.9 | 665.9 | 1224  | 659.7 | 0.3914 |
|                                   | AUC 0_120     | 1867  | 991.9 | 2911  | 1145  | 0.1752 |
|                                   | Peak          | 20.31 | 11.57 | 30.50 | 14.78 | 0.2130 |
|                                   | Peak Time     | 67.33 | 40.50 | 72.33 | 26.65 | 0.8057 |

*p < 0.05 was considered statistically significant.*
